# Supplementary material for: Mechanical stimulation of induced pluripotent stem cell derived cardiac fibroblasts
Source: PubMed Central journal article supplement (PMC11058244; doi:10.1038/s41598-024-60102-w), 2024-04-29
Supplement: 41598_2024_60102_MOESM1_ESM.pdf [file 41598_2024_60102_MOESM1_ESM.pdf]

## Supplemental Information

Table S1: CFBM composition

| Component                    | Catalog nr                       | Final concentration                                            |
|------------------------------|----------------------------------|----------------------------------------------------------------|
| DMEM                         | Thermo Fisher 10566016           | Basal medium                                                   |
| GlutaMAX™ Supplement         | Thermo Fisher 35050061           | 1.5 mM                                                         |
| HLL supplement               | Lifeline cell technology LS-1001 | HSA: 500 µg/mL<br>Linoleic Acid: 0.6 µM<br>Lecithin: 0.6 µg/mL |
| Ascorbic acid                | Sigma, #A-1417                   | 50 µg/mL                                                       |
| Hydrocortisone hemisuccinate | StemCell Technologies # 74142    | 1.0 µg/mL                                                      |
| Rh Insulin                   | Sigma, #I9278                    | 5 µg/mL                                                        |

Table S2: qPCR primer pairs

| Primer name | Forward Primer         | Reverse Primer          |
|-------------|------------------------|-------------------------|
| RPL27       | ATCGCCAAGAGATCAAAGATAA | TCTGAAGACATCCTTATTGACG  |
| TCF21       | TCCTGGCTAACGACAAATACGA | TTCCCGGCCACCATAAAGG     |
| PDGFRA      | TTTTTGTGACGGTCTTGGAAGT | TGTCTGAGTGTGGTTGTAATAGC |
| COL1A1      | GAGGGCCAAGACGAAGACATC  | CAGATCACGTCATCGCACAAC   |
| DDR2        | GCTATATGCCGCTATCCTCTGG | ACTCTGACCACTGACTGGAAG   |
| ACTA2       | AAAAGACAGCTACGTGGGTGA  | GCCATGTTCTATCGGGTACTTC  |
| LOX         | GCATACAGGGCAGATGTCAGA  | TTGGCATCAAGCAGGTCATAG   |
| LOXL2       | AGGACATTCGGATTCGAGCC   | CTTCCTCCGTGAGGCAAAC     |
| MMP1        | CATGCTTTTCAACCAGGCC    | GTCCAAGAGAATGGCCGAGT    |
| TIMP1       | CAACCAGACCACCTTATACC   | GAGTGCCACTCTGCAGTTTG    |
| PAI1        | CAATCGCAAGGCACCTCTGA   | TTCACCAAAGACAAGGGCCA    |
| TGFB1       | CTCTCCGACCTGCACAGA     | AACCTAGATGGGCGGATCT     |

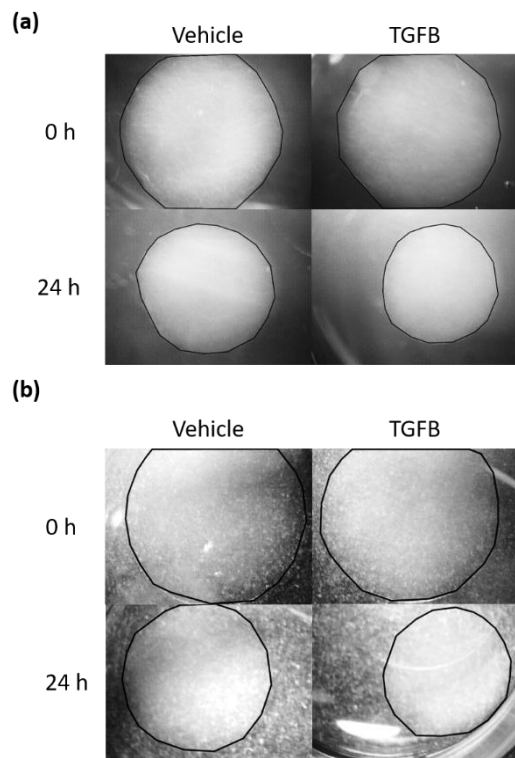

Figure S1: Gel contraction assay in a) iPSC derived cardiac fibroblasts and b) primary adult CF. Related to figure 1.

**(a)**

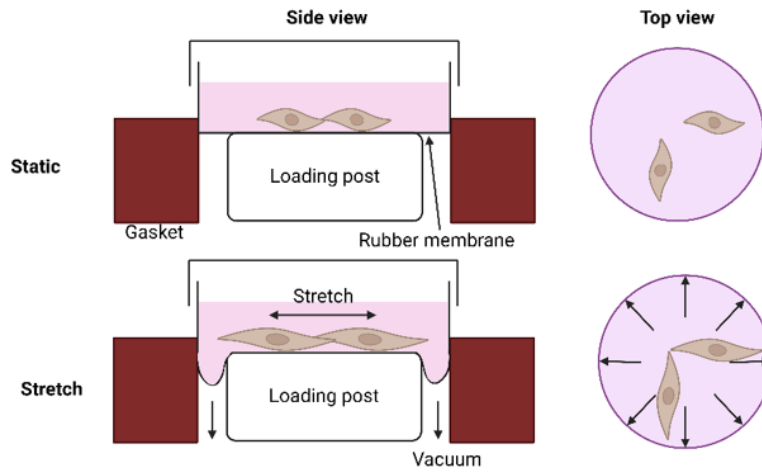

**(b)**

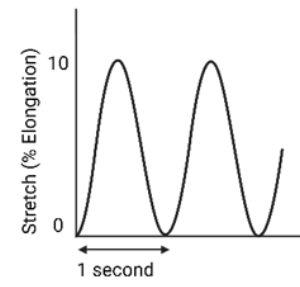

Figure S2: (a) Schematic describing the mechanism of equiaxial cyclic stretch that is applied on the cells using a vacuum system. (b) An example of the sinusoidal stretch pattern applied, with a maximum of 10% elongation and a frequency of 1 Hz. Related to figure 2-5

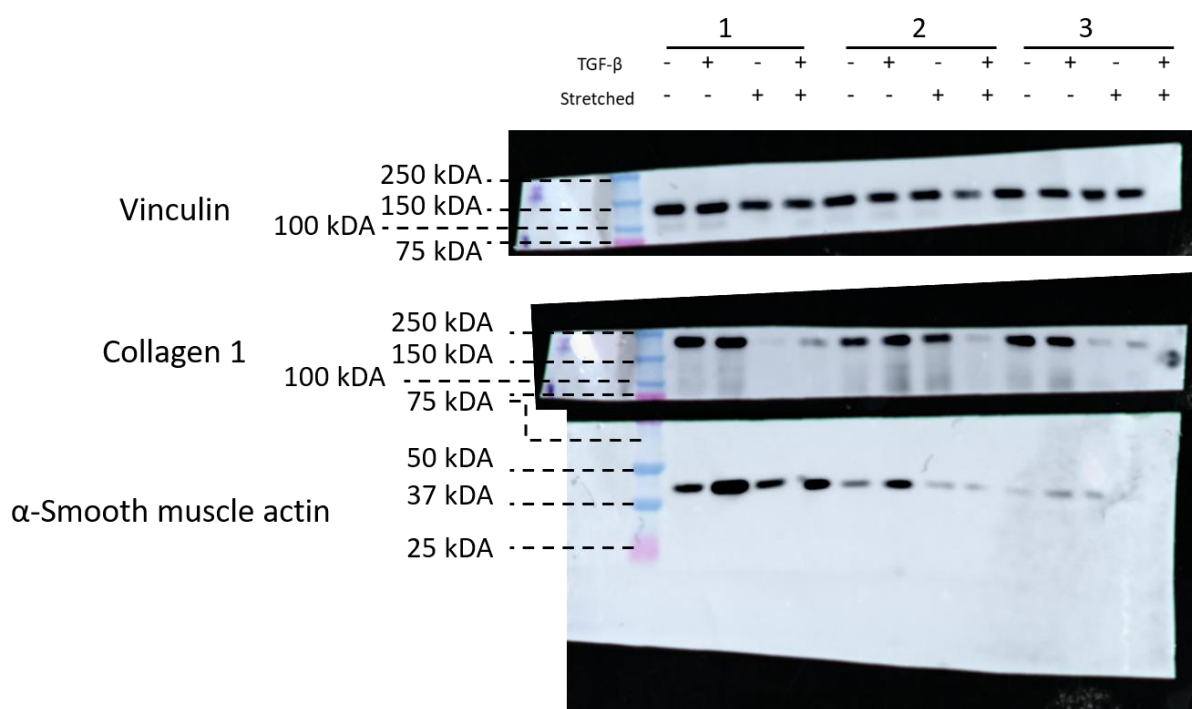

Figure S3: Original blots from western blot analysis for vinculin, collagen 1 and  $\alpha$ -smooth muscle actin. Related to figure 2 and 4
